# Supplementary material for: Over 20% external quantum efficiency in red thermally activated delayed fluorescence organic light-emitting diodes using a reverse intersystem crossing activating host
Source: Royal Society of Chemistry journal article supplement (doi:10.1039/c7tc05811j), 2018-01-01
Supplement: c7tc05811j1.pdf [file c7tc05811j1.pdf]

## Supporting information

### **Over 20% external quantum efficiency in red thermally activated delayed fluorescent organic light-emitting diodes using a reverse intersystem crossing activating host**

**Ji Han Kim<sup>+</sup>, Dong Ryun Lee<sup>+</sup>, Si Hyun Han, Jun Yeob Lee \***

School of Chemical Engineering, Sungkyunkwan University

2066, Seobu-ro, Jangan-gu, Suwon-si, Gyeonggi-do, 440-746, Korea

Fax: (+) 82-31-299-4716

E-mail: [leej17@skku.edu](mailto:leej17@skku.edu)

\* To whom correspondence should be addressed

+ Ji Han Kim and Dong Ryun Lee contributed equally.

## List of figures

Figure S1. Current density-voltage and luminance-voltage curves of CBP:HAP-3TPA devices according to HAP-3TPA doping concentration.

Figure S2. Quantum efficiency-luminance curves of CBP:HAP-3TPA devices according to HAP-3TPA doping concentration.

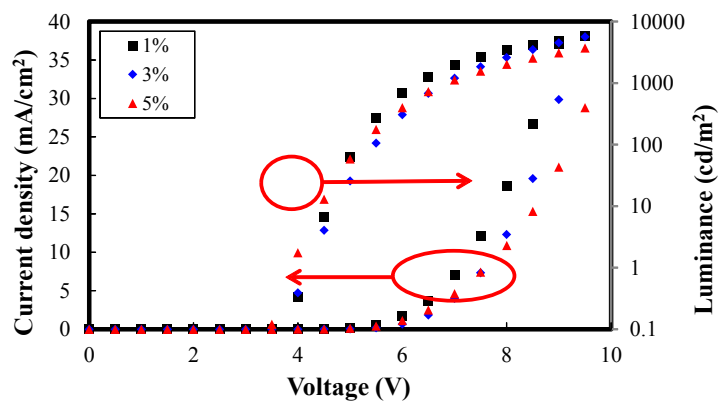

Figure S1

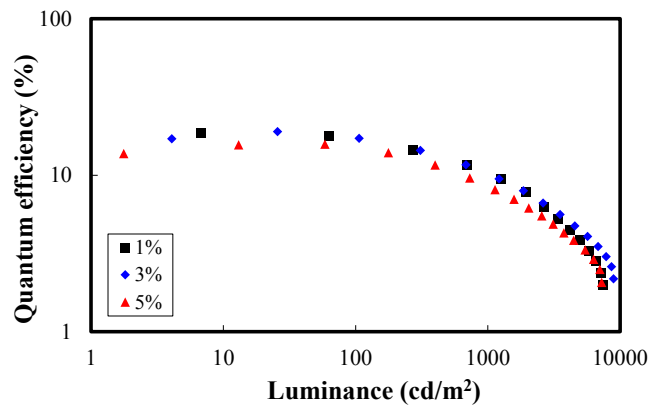

Figure S2
